# Supplementary material
Source: publisher site journal article supplement (https://kjim.org/upload/media/kjim-2025-224-Supplementary-Fig-1.pdf)

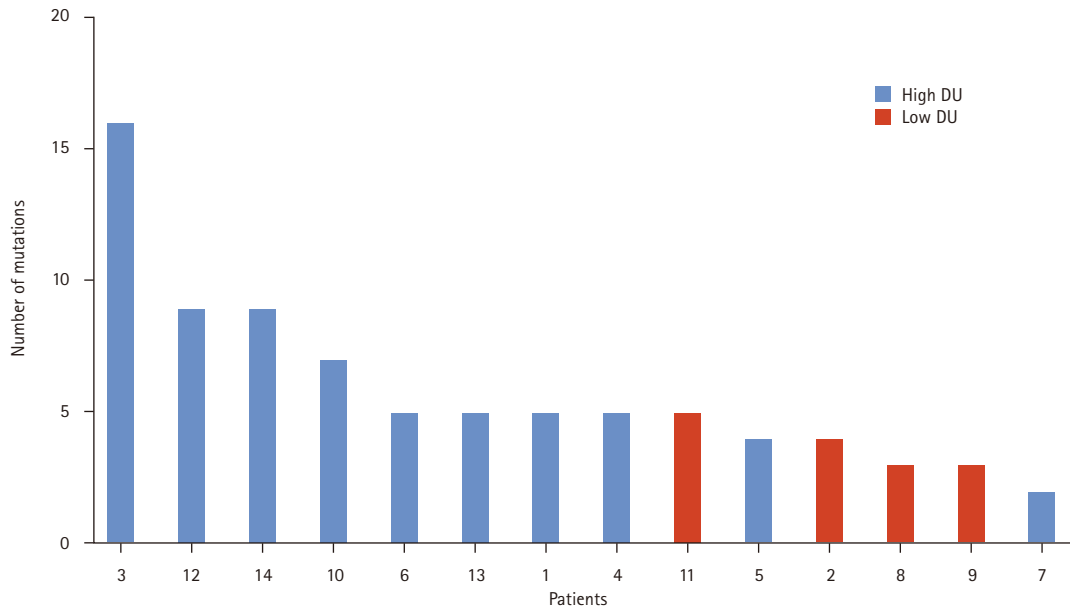

**Supplementary Figure 1.** Number of mutations per patient. DU, diffuse uptake.

Supplement: Supplementary file 1 [file kjim-2025-224-Supplementary-Fig-1.pdf]
